# Supplementary material for: An overall and dose-response meta-analysis for thyrotropin and thyroid cancer risk by histological type
Source: PubMed Central journal article supplement (PMC5216976; doi:10.18632/oncotarget.10282), 2016-06-24
Supplement: oncotarget-07-47750-s001.pdf [file oncotarget-07-47750-s001.pdf]

## An overall and dose-response meta-analysis for thyrotropin and thyroid cancer risk by histological type

### Supplementary Materials

**Supplementary Table S1: Assessment of study quality**

| Studies (all cohort studies)      | Quality Indicators From Newcastle-Ottawa Scale |   |   |   |    |    |   |   |   |
|-----------------------------------|------------------------------------------------|---|---|---|----|----|---|---|---|
|                                   | 1                                              | 2 | 3 | 4 | 5A | 5B | 6 | 7 | 8 |
| Boelaert et al. (UK ) [10]        | ★                                              | ★ | ★ | ★ | ★  | ★  | ★ | ★ | ★ |
| Haymart et al. (UK) [11]          | ★                                              | ★ | ★ | ★ | ★  | ★  | ★ | ★ | ★ |
| Jonklaas et al. (USA) [12]        | ★                                              |   | ★ | ★ | ★  | ★  | ★ |   | ★ |
| Polyzos et al. (Greece) [13]      | ★                                              |   | ★ | ★ | ★  | ★  | ★ | ★ | ★ |
| Fiore et al. (Italy) [1]          |                                                |   | ★ | ★ | ★  | ★  | ★ | ★ | ★ |
| Fiore et al. (Italy) [15]         |                                                | ★ | ★ | ★ | ★  | ★  | ★ | ★ | ★ |
| Gul et al. (Turkey) [17]          | ★                                              | ★ | ★ | ★ | ★  | ★  | ★ |   | ★ |
| Dorange et al. (France) [22]      | ★                                              | ★ | ★ | ★ | ★  | ★  | ★ | ★ | ★ |
| Rio et al. (Brazil) [23]          | ★                                              | ★ | ★ | ★ |    | ★  | ★ |   | ★ |
| Ding et al (China) [21]           | ★                                              | ★ | ★ | ★ |    |    | ★ | ★ | ★ |
| Zafon et al. (Spain) [26]         | ★                                              | ★ | ★ | ★ |    |    | ★ |   | ★ |
| Kim et al. (Korea) [19]           | ★                                              | ★ | ★ | ★ | ★  | ★  | ★ |   | ★ |
| Haymart et al.( USA) [14]         | ★                                              |   | ★ | ★ | ★  | ★  | ★ | ★ | ★ |
| Kim et al. (Korea) [27]           | ★                                              | ★ | ★ | ★ | ★  | ★  | ★ | ★ | ★ |
| Kim et al. (Korea) [7]            | ★                                              | ★ | ★ | ★ | ★  |    | ★ |   | ★ |
| Lee et al.(Korea) [24]            | ★                                              | ★ | ★ | ★ | ★  |    | ★ | ★ | ★ |
| Jiao et al.(China) [28]           | ★                                              | ★ | ★ | ★ | ★  |    | ★ |   | ★ |
| Nixon et al.(USA) [20]            |                                                | ★ | ★ | ★ |    | ★  | ★ |   | ★ |
| Jin et al.(USA) [18]              | ★                                              | ★ | ★ |   | ★  | ★  | ★ | ★ | ★ |
| Maia et al. (Brazil) [7]          | ★                                              | ★ | ★ | ★ | ★  | ★  | ★ | ★ | ★ |
| Moon et al.(Korea) [25]           |                                                | ★ | ★ | ★ | ★  | ★  | ★ | ★ | ★ |
| Gerschpacher et al.(Austria) [16] |                                                | ★ | ★ | ★ | ★  | ★  | ★ | ★ | ★ |

For cohort studies, 1 indicates exposed cohort truly representative; 2, nonexposed cohort drawn from the same community; 3, ascertainment of exposure; 4, outcome of interest not present at start; 5A, cohorts comparable on basis of age; 5B, cohorts comparable on other factor(s); 6, quality of outcome assessment; 7, follow-up long enough for outcomes to occur; and 8, complete accounting for cohorts.

**Supplementary Table S2: Sensitivity analysis**

| <b>Study omitted</b>     | <b>Pooled ORs</b> | <b>95% CI</b> |
|--------------------------|-------------------|---------------|
| Boelaert et al.2006      | 2.00              | 1.63–2.47     |
| Haymart et al.2007       | 2.01              | 1.63–2.48     |
| Polyzos et al. 2008      | 2.02              | 1.62–2.52     |
| Fiore et al. 2009        | 1.97              | 1.62–2.38     |
| Fiore et al. 2010        | 2.07              | 1.68–2.54     |
| Gul et al. 2010          | 1.93              | 1.58–2.36     |
| Kim et al.2010           | 2.03              | 1.64–2.52     |
| Ding et al.2011          | 1.99              | 1.62–2.45     |
| Rio et al. 2011          | 2.07              | 1.67–2.57     |
| Kim et al. 2012          | 2.03              | 1.63–2.53     |
| Zafon et al. 2012        | 2.09              | 1.69–2.57     |
| lee et al.2012           | 2.04              | 1.78–2.35     |
| Zafon et al. 2014        | 2.02              | 1.64–2.49     |
| Nixon et al.2014         | 1.93              | 1.58–2.36     |
| Jiao et al.2015          | 1.99              | 1.62–2.45     |
| Jin et al.2010           | 1.97              | 1.60–2.41     |
| Moon et al.2012          | 2.01              | 1.63–2.48     |
| Maia et al.2010          | 1.98              | 1.61–2.44     |
| Gerschpacher et al. 2010 | 2.03              | 1.65–2.50     |
| Combined                 | 2.01              | 1.64–2.46     |
